# Supplementary material for: Carbon dioxide dynamics in an agricultural headwater stream driven by hydrology and primary production
Source: Copernicus journal article supplement (doi:10.5194/bg-17-2487-2020), 2020-05-08
Supplement: Supplementary file 1 [file bg-17-2487-2020-supplement.pdf]

Supplement of Biogeosciences, 17, 2487–2498, 2020  
<https://doi.org/10.5194/bg-17-2487-2020-supplement>  
© Author(s) 2020. This work is distributed under  
the Creative Commons Attribution 4.0 License.

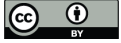

*Supplement of*

## **Carbon dioxide dynamics in an agricultural headwater stream driven by hydrology and primary production**

**Marcus B. Wallin et al.**

*Correspondence to:* Marcus B. Wallin ([marcus.wallin@slu.se](mailto:marcus.wallin@slu.se))

The copyright of individual parts of the supplement might differ from the CC BY 4.0 License.

## Supplementary information

15 **Table S1. Catchment characteristics, land use distribution and water chemistry for ten stream sites located around the city of Uppsala in a radius of 10 km (Osterman 2018)**

| Site           | Catchment area (km <sup>2</sup> ) | Agriculture (%) | Forest (%) | Urban (%) | NO <sub>3</sub> -N <sup>b</sup> (mg L <sup>-1</sup> ) | PO <sub>4</sub> -P <sup>b</sup> (mg L <sup>-1</sup> ) | DOC <sup>b</sup> (mg L <sup>-1</sup> ) | Temp <sup>c</sup> (°C) | pH <sup>c</sup> (-) | EC <sup>c</sup> (µS cm <sup>-1</sup> ) | CO <sub>2</sub> -C <sup>c</sup> (mg L <sup>-1</sup> ) |
|----------------|-----------------------------------|-----------------|------------|-----------|-------------------------------------------------------|-------------------------------------------------------|----------------------------------------|------------------------|---------------------|----------------------------------------|-------------------------------------------------------|
| 1              | 25                                | 52              | 45         | 2         | 0.3                                                   | 0.05                                                  | 6.6                                    | 11.8                   | 7.6                 | 594                                    | 2.8                                                   |
| 2              | 200                               | 42              | 56         | 1         | 1.6                                                   | 0.02                                                  | 7.9                                    | 11.5                   | 7.4                 | 552                                    | 4.5                                                   |
| 3 <sup>a</sup> | 11                                | 86              | 8          | 6         | 0.7                                                   | 0.07                                                  | 10.0                                   | 10.5                   | 7.9                 | 1129                                   | 2.7                                                   |
| 4              | 14                                | 56              | 44         | 0         | 0.7                                                   | 0.10                                                  | 10.8                                   | 9.8                    | 7.9                 | 610                                    | 3.1                                                   |
| 5              | 21                                | 46              | 45         | 5         | 2.7                                                   | 0.04                                                  | 5.7                                    | 11.4                   | 7.9                 | 892                                    | 2.9                                                   |
| 6              | 780                               | 35              | 59         | 2         | 0.4                                                   | 0.01                                                  | 14.6                                   | 16.4                   | 7.8                 | 483                                    | 2.2                                                   |
| 7              | 105                               | 30              | 62         | 6         | 0.2                                                   | 0.02                                                  | 10.9                                   | 14.0                   | 7.8                 | 678                                    | 3.0                                                   |
| 8              | 23                                | 39              | 59         | 0         | 0.6                                                   | 0.24                                                  | 15.6                                   | 11.9                   | 7.7                 | 810                                    | 4.3                                                   |
| 9              | 740                               | 35              | 63         | 1         | 0.3                                                   | 0.02                                                  | 13.8                                   | 16.4                   | 7.9                 | 585                                    | 1.8                                                   |
| 10             | 210                               | 39              | 57         | 1         | 0.1                                                   | 0.01                                                  | 12.4                                   | 14.2                   | 7.4                 | 719                                    | 4.6                                                   |
| <b>Median</b>  | <b>65</b>                         | <b>41</b>       | <b>57</b>  | <b>2</b>  | <b>0.5</b>                                            | <b>0.03</b>                                           | <b>10.9</b>                            | <b>11.9</b>            | <b>7.8</b>          | <b>644</b>                             | <b>3.0</b>                                            |

<sup>a</sup>The SBM catchment

<sup>b</sup>Median values based on eight sampling occasions during June-November 2017

<sup>c</sup>Based on one sampling occasion, June 21 2018

**Table S2. Separation of hydrological periods used for evaluation of the stream CO<sub>2</sub> data.**

| <b>Period</b> | <b>Time period</b>       | <b>Total number of days</b> |
|---------------|--------------------------|-----------------------------|
| Autumn        | 2017-09-26 to 2017-12-13 | 49                          |
| Snowmelt      | 2018-03-28 to 2018-04-13 | 17                          |
| Spring        | 2018-04-14 to 2018-07-14 | 91                          |
| Dry period    | 2018-07-15 to 2018-11-30 | 138                         |

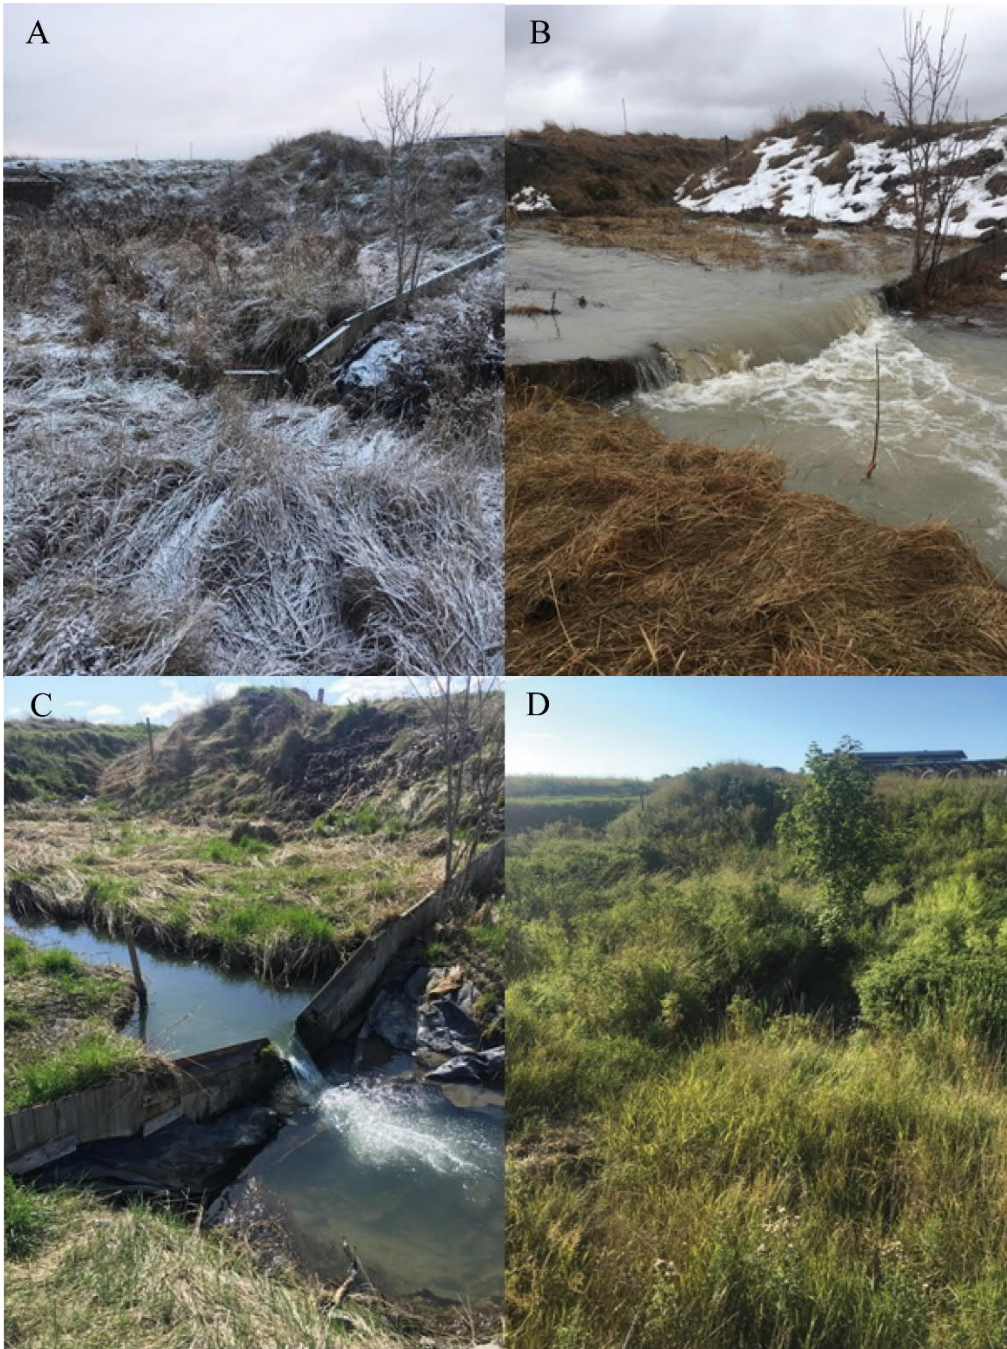

25 **Figure S1. The v-notch weir at the outlet of the SBM catchment at the four different periods with exact photo date within brackets; A) Autumn (December 12), B) Snowmelt (April 6), C) Spring (May 4), and D) Dry period (August 7)**

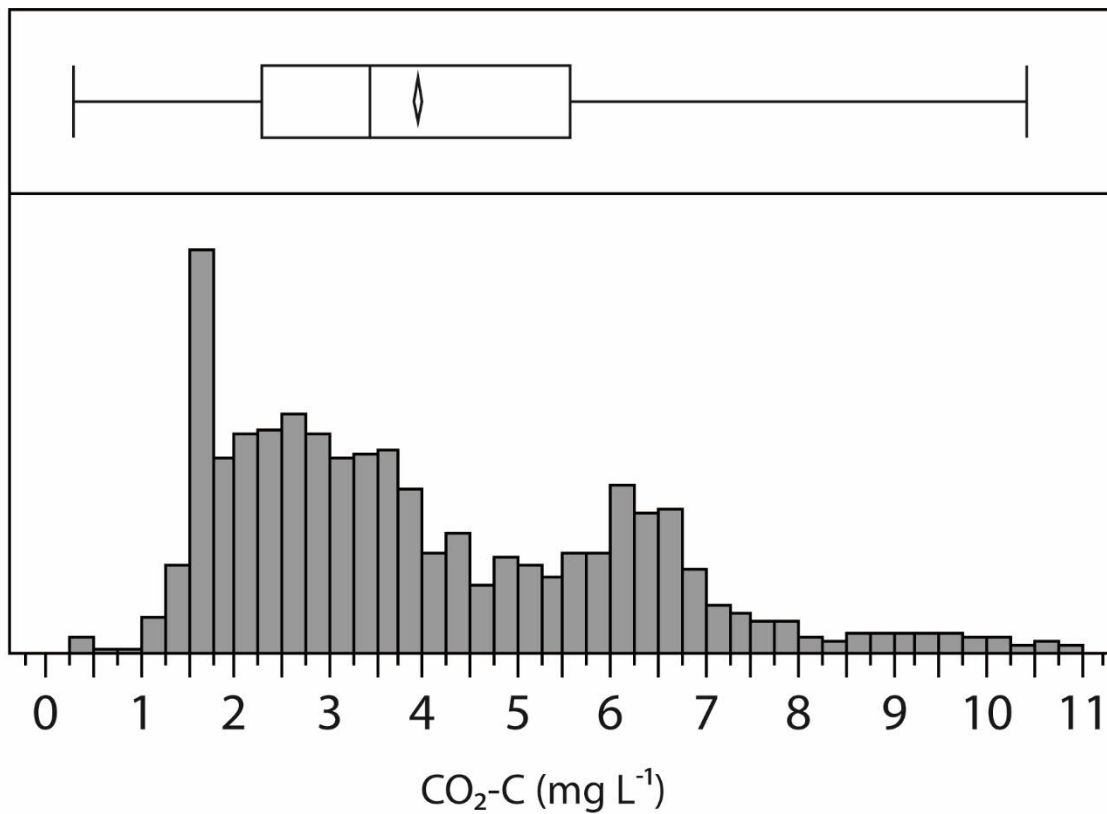

30 **Figure S2. Distribution in stream CO<sub>2</sub> concentration data for the study period (n = 6713). Upper boxplot shows mean (diamond), median (line), IQR (box), 10<sup>th</sup> and 90<sup>th</sup> percentiles (whiskers).**
